# Supplementary material for: The active surveillance management approach for patients with low risk papillary thyroid microcarcinomas: is China ready?
Source: PubMed Central journal article supplement (PMC9196058; doi:10.20892/j.issn.2095-3941.2021.0058), 2021-09-24
Supplement: cbm-19-619-s001.pdf [file cbm-19-619-s001.pdf]

# Supplementary materials

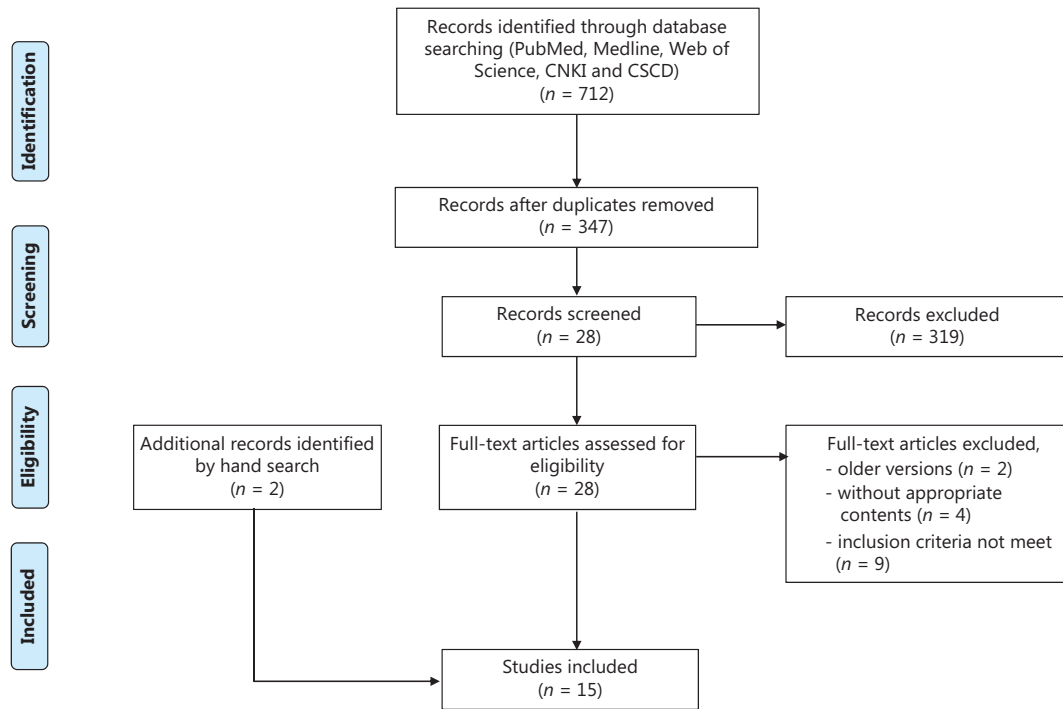

**Figure S1** PRISMA flow chart of the included guidelines/consensus. The medical subject heading searches used all combinations of the following index terms: thyroid neoplasms, guidelines, and consensus. Articles not available in English or Chinese editions were excluded. Guidelines regarding other types of histology/diseases, other populations (e.g., pediatric and pregnant populations), diagnosis, or RAIA alone were excluded.

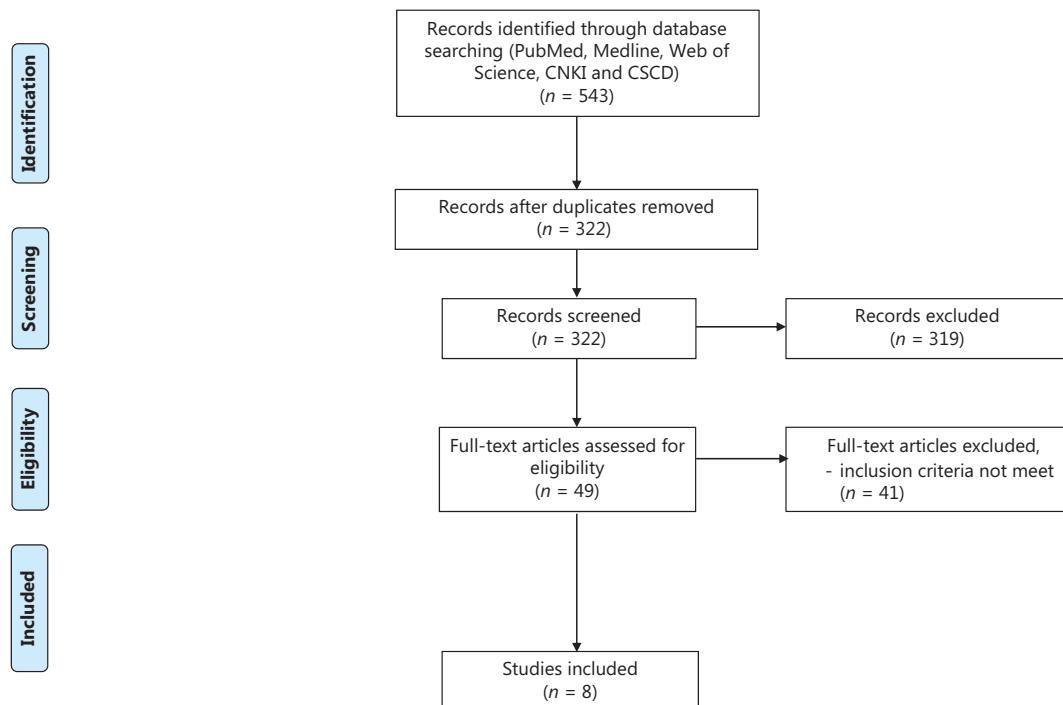

**Figure S2** PRISMA flow chart of the active surveillance cohorts.
